# Supplementary material for: Routinization of prenatal screening with the non-invasive prenatal test: pregnant women’s perspectives
Source: PubMed Central journal article supplement (PMC9177612; doi:10.1038/s41431-021-00940-8), 2021-08-13
Supplement: 41431_2021_940_MOESM1_ESM.pdf [file 41431_2021_940_MOESM1_ESM.pdf]

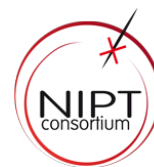

## Appendix: The Dutch NIPT Consortium.

*The Dutch NIPT Consortium consists of obstetric care givers, laboratory specialists and other professionals from:*

### **Amsterdam UMC\***

#### Clinical Genetics:

Dr. E.A. Siermans (also for the Dutch Association of Clinical Genetic Diagnostic Laboratories (VKGL))  
Prof. L. Henneman  
Dr. A. Polstra  
E. Voorhoeve MSc  
S.L. Zelderen-Bhola MSc  
Dr. E.M.J. Boon  
Dr. M.P.R. Lombardi  
I.M.C. Bakker MSc  
E.J. Bradley BSc  
C. Louwerens-Zintel BSc  
M. Smit BSc  
Dr. M.C. van Maarle  
M.B. Tan-Sindhunata MSc  
K. van der Meij MSc  
Prof. H. Meij

#### Obstetrics and Gynaecology:

Dr. C.J. Bax (also for the Dutch Organization of Obstetrics and Gynaecology (NVOG))  
Prof. E. Pajkrt  
Dr. I.H. Linskens

#### Midwifery Science AVAG:

Dr. L. Martin  
Dr. J.T. Gitsels-van der Wal

### **Erasmus Medical Center, Rotterdam\***

#### Clinical Genetics:

Dr. R.J.H. Galjaard (also for the Dutch Association of Clinical Geneticists (VKGN))  
Dr. D. Van Opstal  
Dr. M.I. Srebniak  
Dr. F.M. Sarquis Jehee  
I.H.I.M Hollink MSc  
Dr. F. Sleutels  
W. de Valk BSc  
W.H. Deelen BSc  
Dr. A.M.S. Joosten  
Dr. K.E.M. Diderich  
M.E. Redeker

#### Obstetrics and Gynaecology:

Dr. A.T.J.I Go  
Dr. M.F.C.M. Knapen  
Dr. S. Galjaard  
Dr. A.K.E. Prinsen

#### Information & Technology:

A.P.G. Braat

### **Leiden University Medical Center**

#### Clinical Genetics:

Dr. M.J.V. Hoffer  
Dr. N.S. den Hollander

#### Obstetrics and Gynaecology:

Dr. E.J.T. Verweij  
Dr. M.C. Haak

### **Maastricht University Medical Center\***

#### Clinical Genetics:

Dr. M.V.E. Macville  
Dr. S.J.C. Stevens  
Dr. A. van der Wijngaard  
Dr. H. Scheffer  
L.H. Houben  
M.A.A. van Esch-Lennarts BSc  
Prof. C.E.M. de Die-Smulders  
Prof. H. Brunner

#### Obstetrics and Gynaecology:

M.J. Pieters MD (also for the Regional Centres Prenatal Screening in The Netherlands)  
Dr. A.B.C. Coumans

### **Radboud University Medical Center, Nijmegen**

#### Clinical Genetics:

Dr. D.F.C.M. Smeets  
Dr. B.H.W. Faas  
Dr. D.E.M. Oldeweghuis  
T. Hofste BSc  
I. Derks-Prinsen BSc  
Dr. I. Feenstra

#### Obstetrics and Gynaecology:

Dr. E. Sikkel

### **University Medical Center Groningen**

#### Clinical Genetics:

Dr. R.F. Suijkerbuijk  
Dr. B. Sikkema-Raddatz  
Prof. I.M. van Langen  
Dr. K. Bouman

#### Obstetrics and Gynaecology:

L.K. Duin MD

### **University Medical Center Utrecht**

#### Clinical Genetics:

Dr. G.H. Schuring-Blom  
Dr. K.D. Lichtenbelt

#### Obstetrics and Gynaecology:

Prof. M.N. Bekker

### **The Royal Dutch Organization of Midwives (KNOV)**

Dr. A.J.E.M. van der Ven

### **VSOP Patient Alliance for Rare and Genetic Diseases**

E. van Vliet-Lachotzki MD

### **Erfocentrum, Dutch National Genetic Resource and Information Centre**

J. Pot

### **Dutch NIPT Consortium, project manager**

S. van 't Padje

**\*NIPT laboratories**
