# Supplementary material for: Routinization of prenatal screening with the non-invasive prenatal test: pregnant women’s perspectives
Source: PubMed Central journal article supplement (PMC9177612; doi:10.1038/s41431-021-00940-8), 2021-08-13
Supplement: 41431_2021_940_MOESM2_ESM.pdf [file 41431_2021_940_MOESM2_ESM.pdf]

## Supplementary information

Table S1 Knowledge questions.

|                                                                                                                                           | True %      | False %     | I don't know% |
|-------------------------------------------------------------------------------------------------------------------------------------------|-------------|-------------|---------------|
| All children with Down syndrome are mentally handicapped. ( <i>true</i> )                                                                 | <b>68.5</b> | 18.4        | 12.1          |
| The combined test consists of a nuchal translucency measurement of the fetus using ultrasound and a maternal blood test. ( <i>true</i> )  | <b>86.4</b> | 8.0         | 5.7           |
| An abnormal (unfavourable) NIPT result means that the child definitely has a trisomy 21,18 or 13. ( <i>false</i> )                        | 7.9         | <b>86.0</b> | 6.1           |
| In the case of a normal (favourable) NIPT result, there is still a small chance that the child has a trisomy 21,18 or 13. ( <i>true</i> ) | <b>70.2</b> | 19.0        | 10.8          |
| The combined test can more accurately determine whether the child has Down syndrome than the NIPT. ( <i>false</i> )                       | 7.5         | <b>86.4</b> | 6.1           |
| Amniocentesis/chorionic villus sampling will give certainty about the presence of Down syndrome in the child. ( <i>true</i> )             | <b>66.8</b> | 17.7        | 15.5          |
| Prenatal screening for Down syndrome is mandatory for everyone. ( <i>false</i> )                                                          | 0.4         | <b>98.0</b> | 1.6           |

Table S2 Measures of informed choice.

|                   | Description                                                                                                                  | Items                                                                | Range | Mean (SD)  | Reliability | Cut-off                                                  | Outcome                                         |
|-------------------|------------------------------------------------------------------------------------------------------------------------------|----------------------------------------------------------------------|-------|------------|-------------|----------------------------------------------------------|-------------------------------------------------|
| Knowledge         | Knowledge regarding prenatal screening, NIPT, FCT, Down syndrome, invasive testing and the meaning of possible test results. | Seven true-false statements. 'Do not know' was treated as incorrect. | 0-7   | 5.6 (1.2)  | -           | ≥ 5                                                      | Good knowledge: 83.2%                           |
| Deliberation      | Deliberation about the pros and cons of the alternatives                                                                     | Six 5-point Likert scale items                                       | 6-30  | 22.9 (4.1) | 0.822       | >18                                                      | Deliberated: 87.7%                              |
| Attitude          | Attitude towards prenatal screening for Down, Edwards and Patau syndrome                                                     | Five 5-point Likert scale items                                      | 5-25  | 19.4 (4.2) | 0.826       | 5-11 = negative;<br>12-18 = neutral;<br>19-25 = positive | Negative: 6.2%; neutral: 26.8%; positive: 67.0% |
| Uptake            | Intention to accept or decline prenatal screening                                                                            | Choice of three options: no test, NIPT or FCT                        | -     | -          | -           | -                                                        | NIPT: 80.3%; FCT: 2.1%; No test: 17.6%          |
| Value consistency | Consistency between value (attitude) and behaviour (test-uptake)                                                             | calculated                                                           | -     | -          | -           | -                                                        | Value-consistent: 99.2%                         |
| Informed choice   | A choice made with good knowledge, deliberated and behaviourally consistent with attitude                                    | calculated                                                           | -     | -          | -           | -                                                        | Informed choice: 75.3%                          |

FCT= First-trimester Combined Test; NIPT= Non-Invasive Prenatal Test; SD= Standard Deviation.

Table S3 Prediction model of informed choice.

| Variable                     | B (SE)       | OR (95%-CI)       | P-value |
|------------------------------|--------------|-------------------|---------|
| <b>Crude model</b>           |              |                   |         |
| <b>Maternal age</b>          |              |                   |         |
| ≤ 30*                        |              |                   |         |
| 31-35                        | 0.30 (0.25)  | 1.35 (0.83-2.21)  | 0.228   |
| ≥ 36                         | 0.37 (0.32)  | 1.45 (0.77-2.73)  | 0.253   |
| <b>Education level</b>       |              |                   |         |
| Low*                         |              |                   |         |
| Intermediate                 | 1.28 (0.57)  | 3.60 (1.19-10.89) | 0.023   |
| High                         | 1.27 (0.55)  | 3.55 (1.21-10.38) | 0.021   |
| <b>Ethnicity</b>             |              |                   |         |
| Dutch*                       |              |                   |         |
| Other-western                | -0.29 (0.39) | 0.75 (0.35-1.60)  | 0.459   |
| Non-western                  | -0.55 (0.40) | 0.58 (0.27-1.25)  | 0.162   |
| <b>Religious affiliation</b> |              |                   |         |
| None*                        |              |                   |         |
| Religious                    | -0.52 (0.23) | 0.60 (0.38-0.93)  | 0.023   |
| <b>Health literacy</b>       |              |                   |         |
| Adequate*                    |              |                   |         |
| Not adequate                 | 0.11 (0.32)  | 1.11 (0.59-2.10)  | 0.744   |
| <b>Parity</b>                |              |                   |         |
| Nulliparous*                 |              |                   |         |
| Multiparous                  | -0.30 (0.23) | 0.74 (0.47-1.17)  | 0.198   |
| <b>Gestational age</b>       |              |                   |         |
| ≤ 10*                        |              |                   |         |
| 11-14                        | 0.26 (0.23)  | 1.30 (0.84-2.02)  | 0.246   |
| ≥ 15                         | -0.53 (0.56) | 0.59 (0.20-1.75)  | 0.341   |
| <b>Method of conception</b>  |              |                   |         |
| Natural*                     |              |                   |         |
| Assisted                     | 0.23 (0.42)  | 1.26 (0.55-2.90)  | 0.583   |
| <b>Adjusted model</b>        |              |                   |         |
| <b>Education level</b>       |              |                   |         |
| Low*                         |              |                   |         |
| Intermediate                 | 1.22 (0.54)  | 3.37 (1.16-9.77)  | 0.025   |
| High                         | 1.19 (0.52)  | 3.29 (1.19-9.12)  | 0.022   |
| <b>Religious affiliation</b> |              |                   |         |
| None*                        |              |                   |         |
| Religious                    | -0.54 (0.22) | 0.58 (0.38-0.90)  | 0.015   |

\* Reference category; B = unstandardized Beta; CI = Confidence Interval; OR = Odds Ratio; SE = Standard Error. Hosmer and Lemeshow test: 0.997.

Table S4 Reasons for choosing NIPT (n=1652) or FCT (n=29).

| <b>Reasons for choosing NIPT</b>               | <b>Responses (% of cases)</b> | <b>Reasons for choosing FCT</b>                              | <b>Responses (% of cases)</b> |
|------------------------------------------------|-------------------------------|--------------------------------------------------------------|-------------------------------|
| NIPT is more reliable than the FCT             | 480 (29.1%)                   | The possibility to detect other findings by ultrasound       | 9 (31.0%)                     |
| NIPT is a safe test without a miscarriage risk | 308 (18.6%)                   | Because of the additional ultrasound                         | 7 (24.1%)                     |
| NIPT is easy to do                             | 265 (16.0%)                   | I am not eligible for NIPT                                   | 3 (10.3%)                     |
| NIPT can be done early in pregnancy            | 191 (11.6%)                   | It is a safe test without miscarriage risk                   | 3 (10.3%)                     |
| The possibility to detect additional findings  | 167 (10.1%)                   | Because of the fast result                                   | 2 (6.9%)                      |
| The FCT gives a risk result                    | 132 (8.0%)                    | My midwife or doctor recommends FCT                          | 2 (6.9%)                      |
| The risk for follow-up testing is low          | 48 (2.9%)                     | Other                                                        | 2 (6.9%)                      |
| My midwife or doctor recommends NIPT           | 28 (1.7%)                     | It is the standard test                                      | 1 (3.4%)                      |
| My partner, family or others prefer NIPT       | 25 (1.5%)                     | My partner, family or others prefer FCT                      | 0 (0.0%)                      |
| Other                                          | 8 (0.5%)                      | I do not want to participate in scientific research for NIPT | 0 (0.0%)                      |

FCT= First-trimester Combined Test; NIPT= Non-Invasive Prenatal Test
